# Supplementary material for: BCAS2 promotes primitive hematopoiesis by sequestering β-catenin within the nucleus
Source: eLife journal article supplement (doi:10.7554/elife.100497), 2024-09-09

Fig S2C

Uncropped gels for Supplemental Figure2C T7 endonuclease

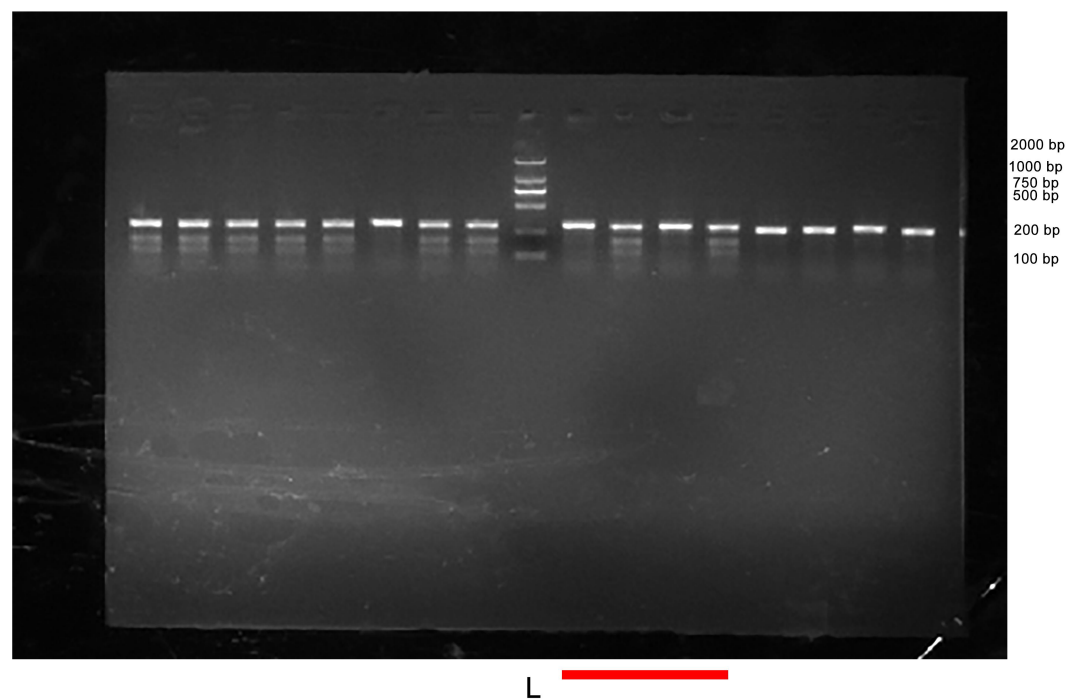

Uncropped gels for Supplemental Figure2C FspI

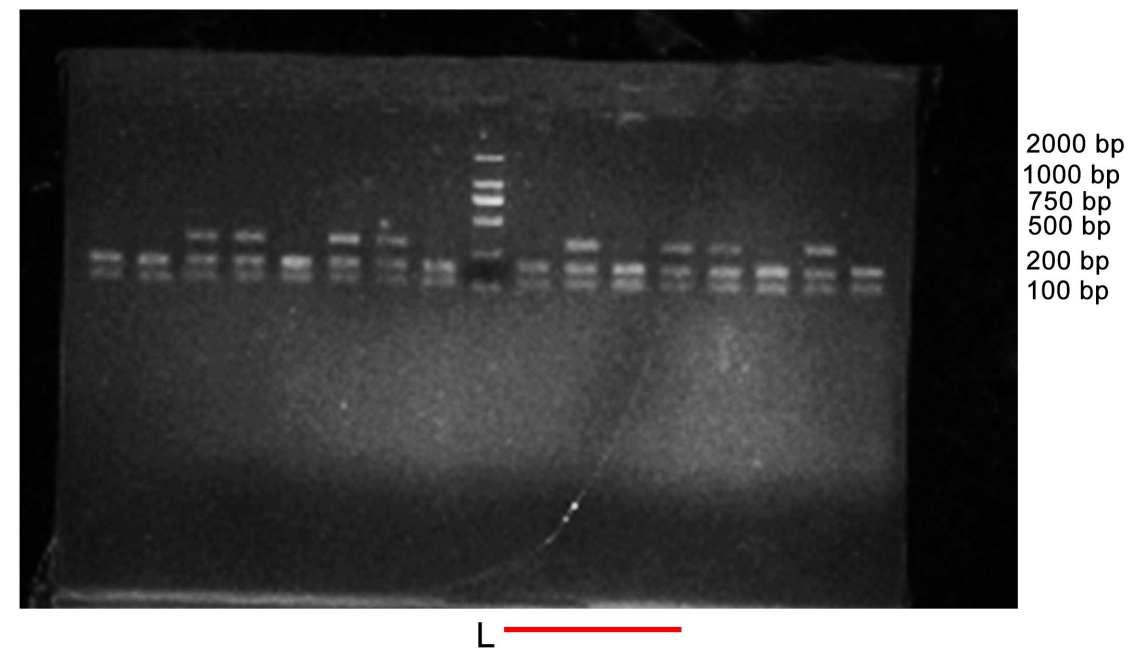

Supplement: fig1-figsupp2-data1 [file elife-100497-fig1-figsupp2-data1-v1.zip]
