# Supplementary figures and images for: BCAS2 promotes primitive hematopoiesis by sequestering β-catenin within the nucleus
Source: eLife journal article supplement (doi:10.7554/elife.100497), 2024-09-09

Figure 1-figure supplement 4

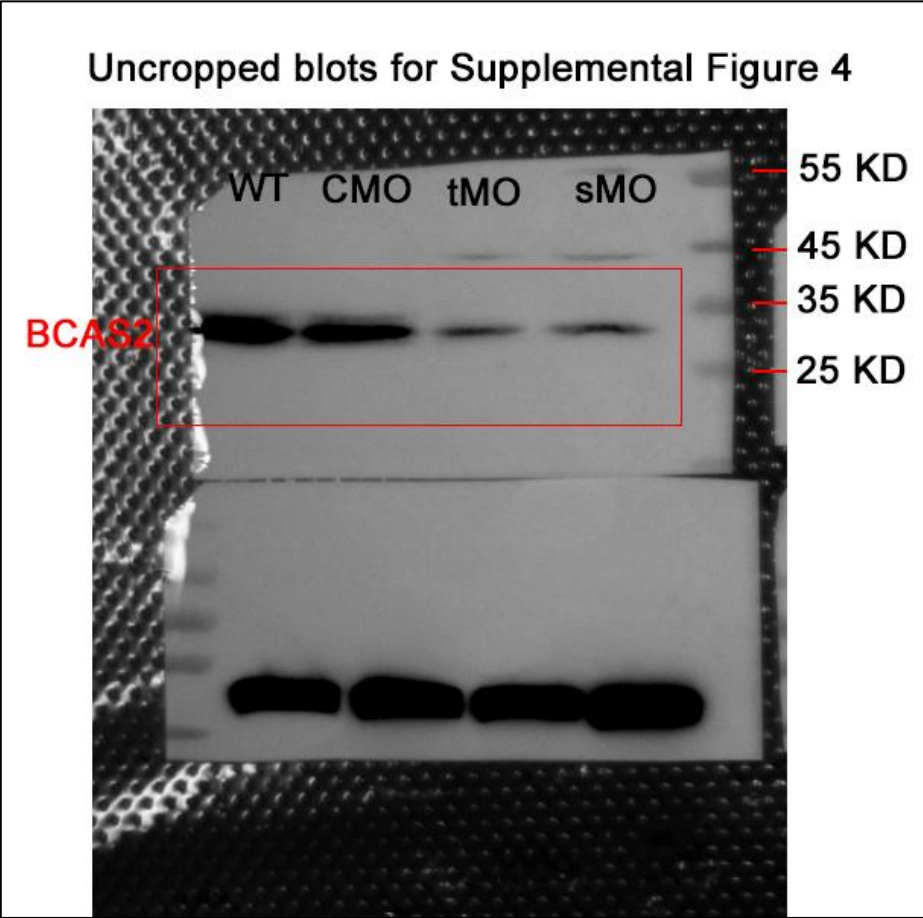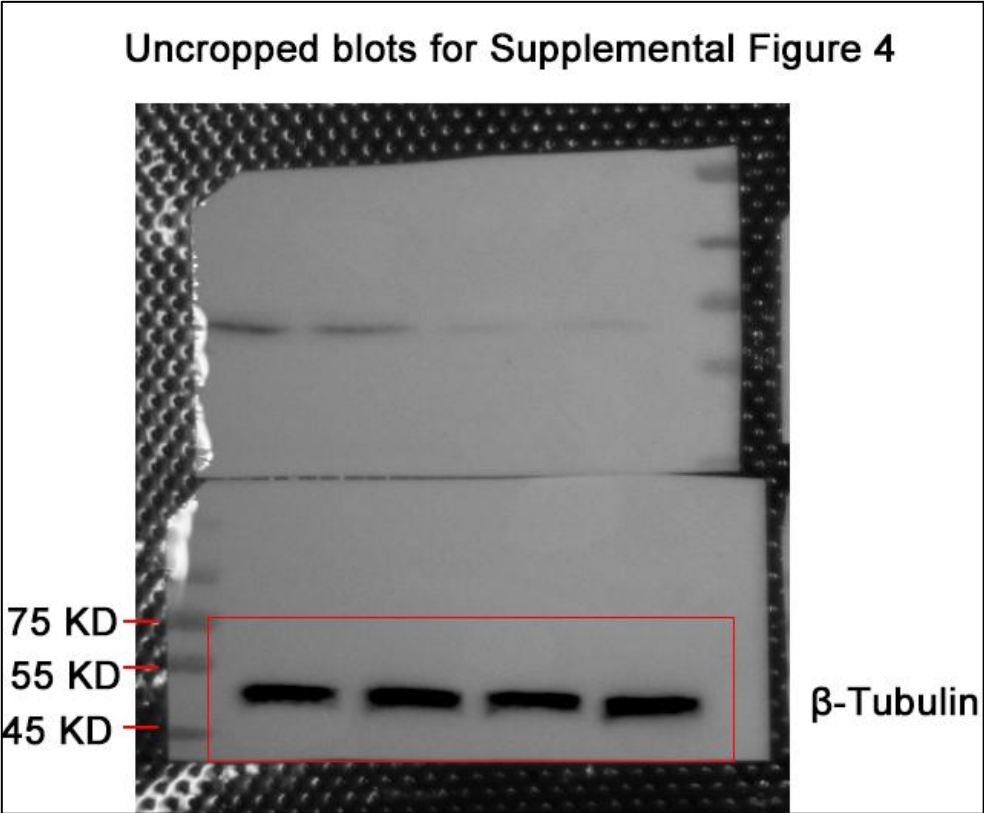

Supplement: fig1-figsupp4-data1 [file elife-100497-fig1-figsupp4-data1-v1.zip]

Figure 3D

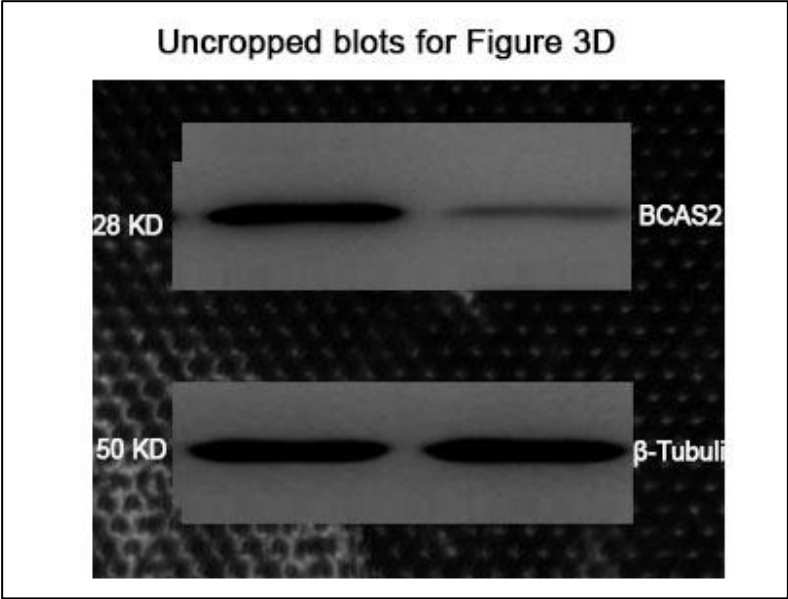

Supplement: fig3-data1 [file elife-100497-fig3-data1-v1.zip]

Figure 3-figure supplement 1

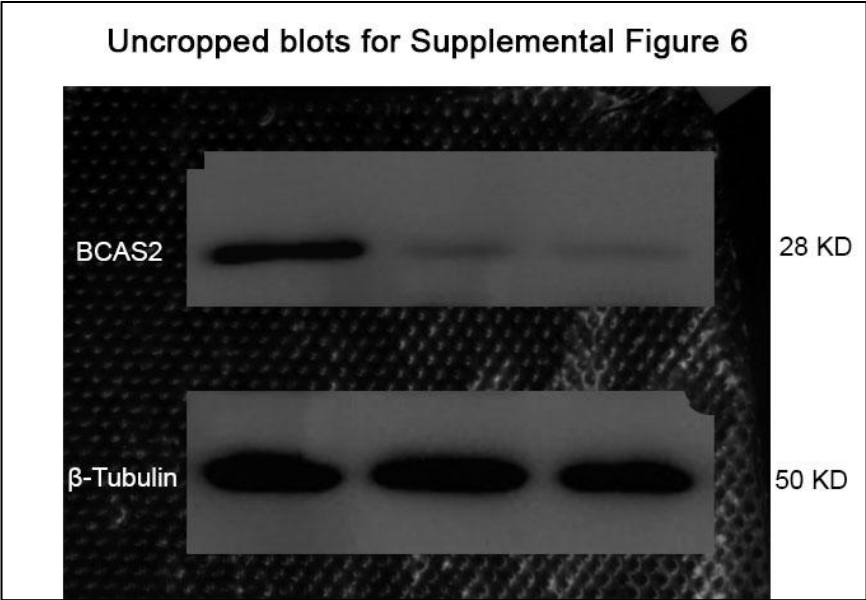

Supplement: fig3-figsupp1-data1 [file elife-100497-fig3-figsupp1-data1-v1.zip]

Figure 4E

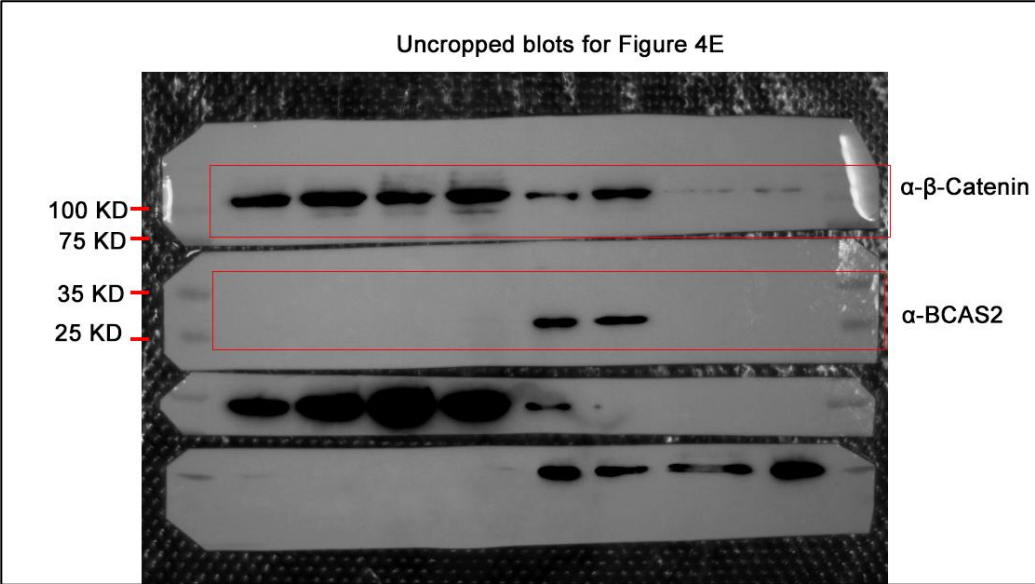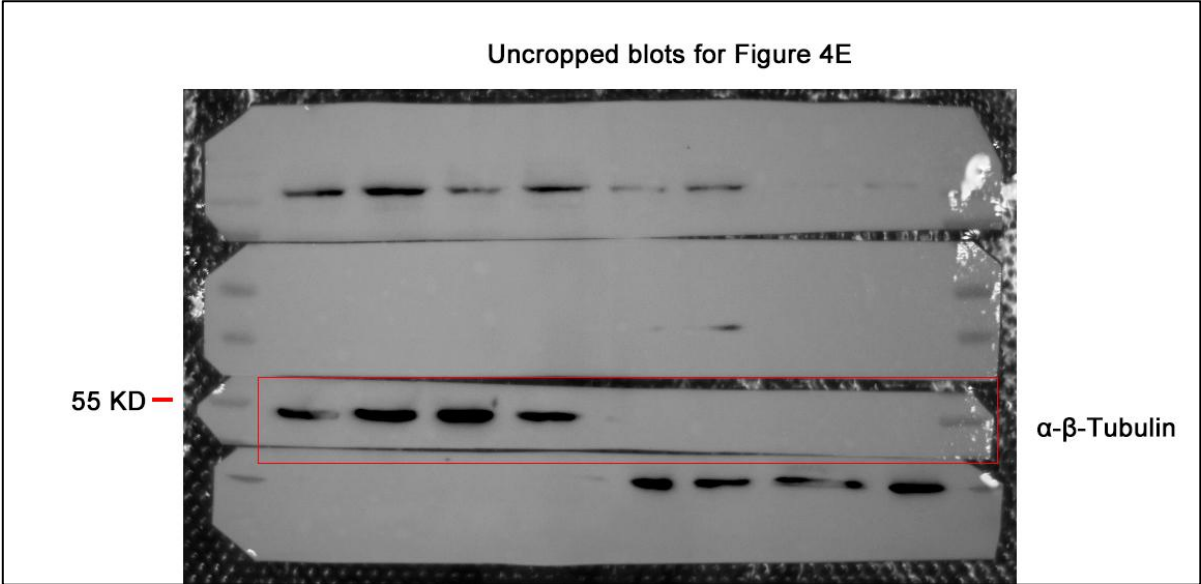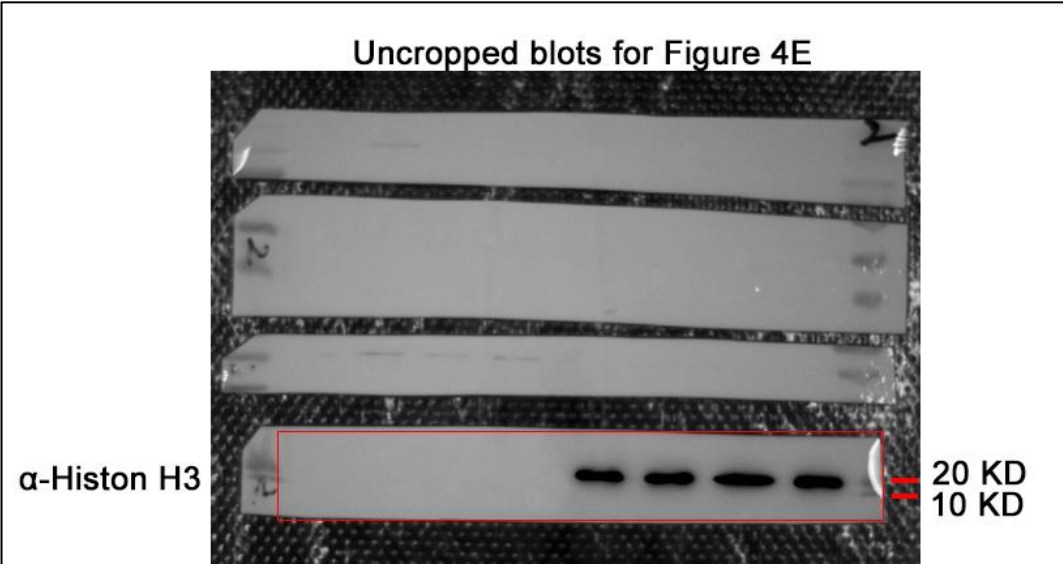

Supplement: fig4-data1 [file elife-100497-fig4-data1-v1.zip]

Figure 6A

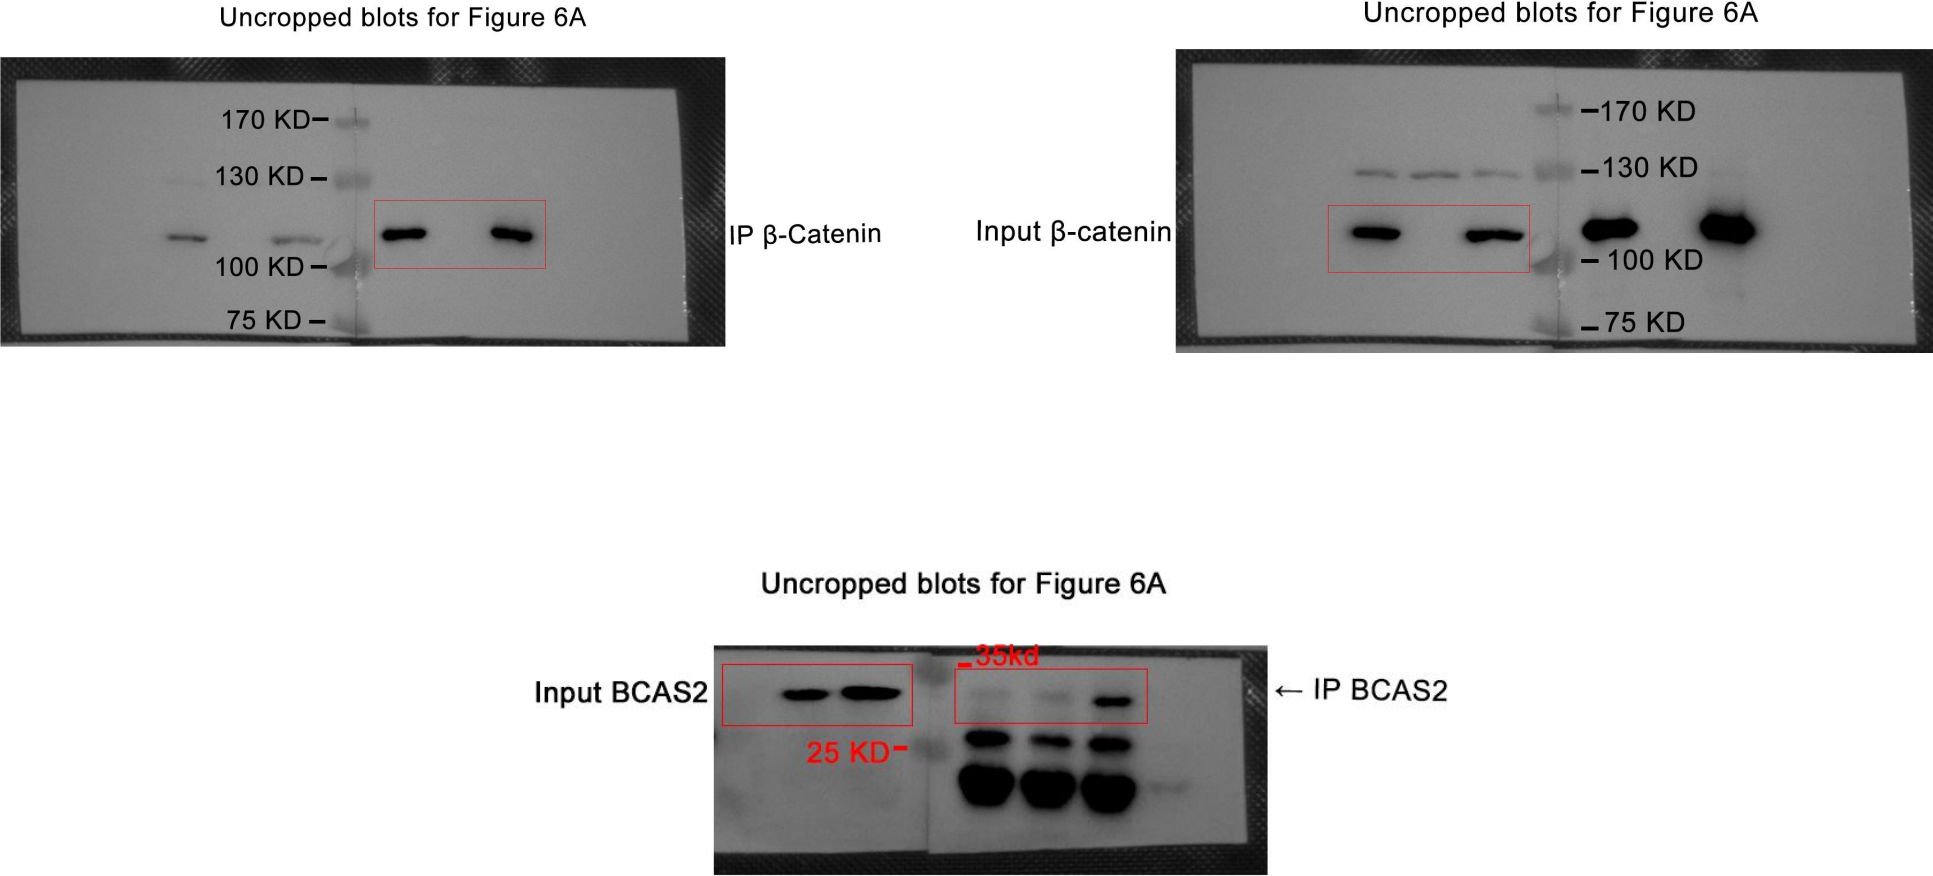

Figure 6B

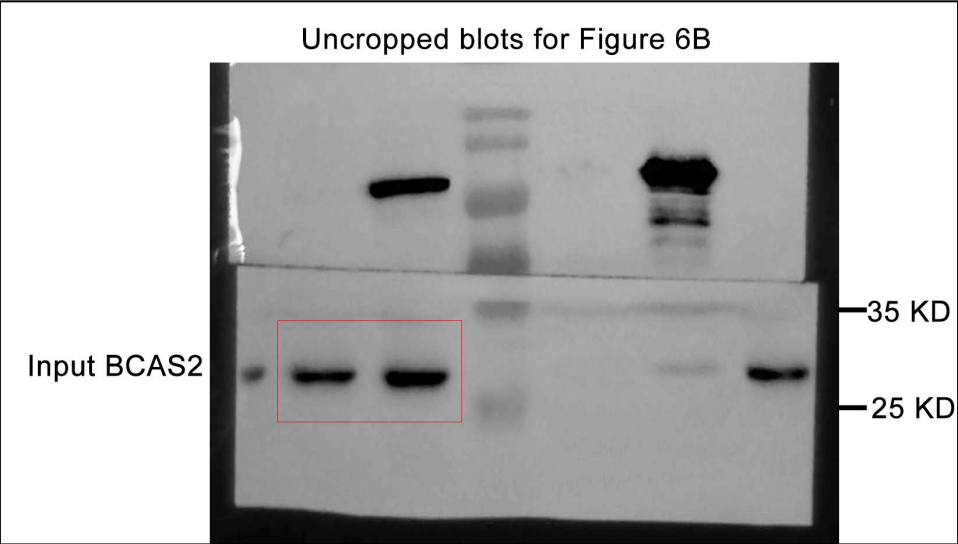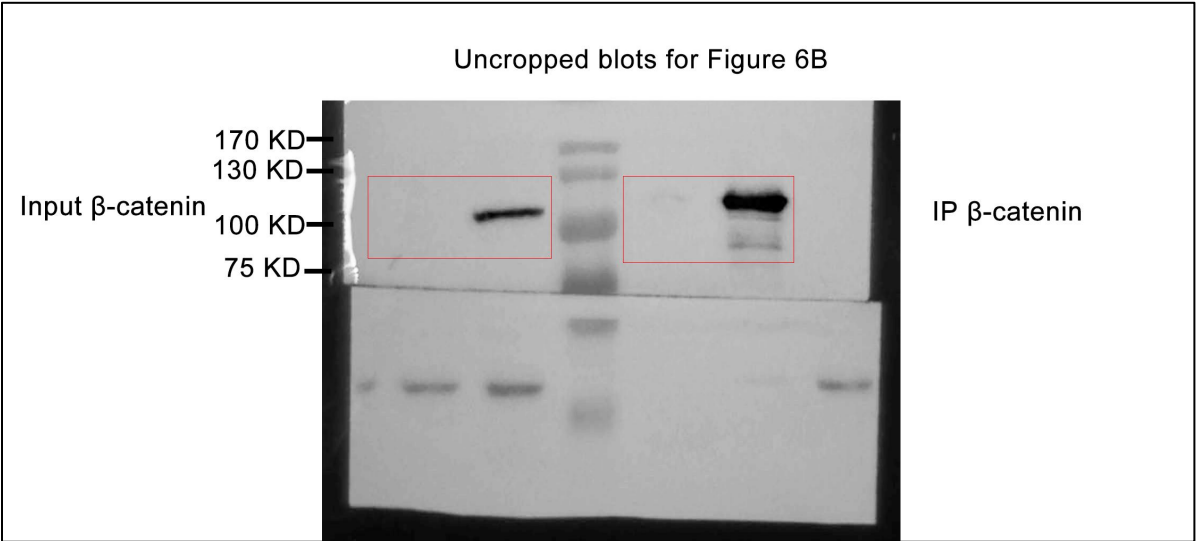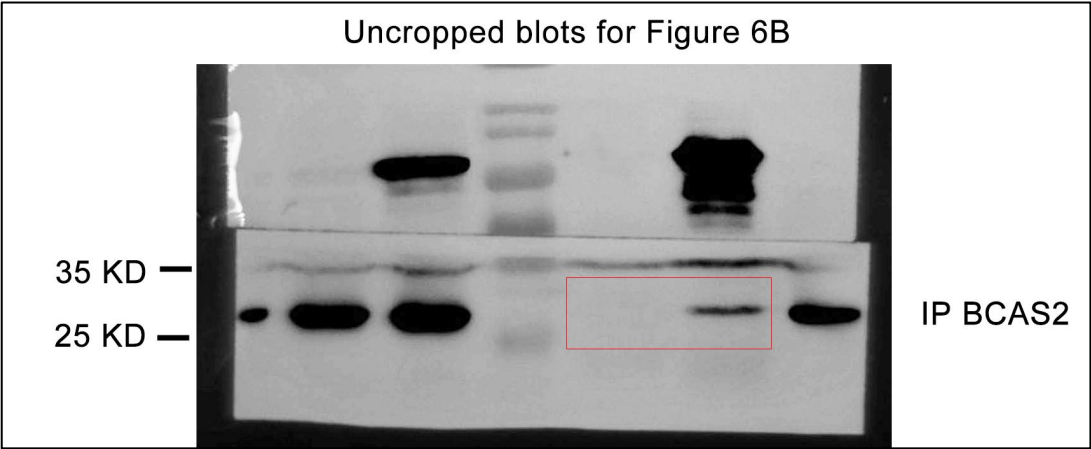

Figure 6C

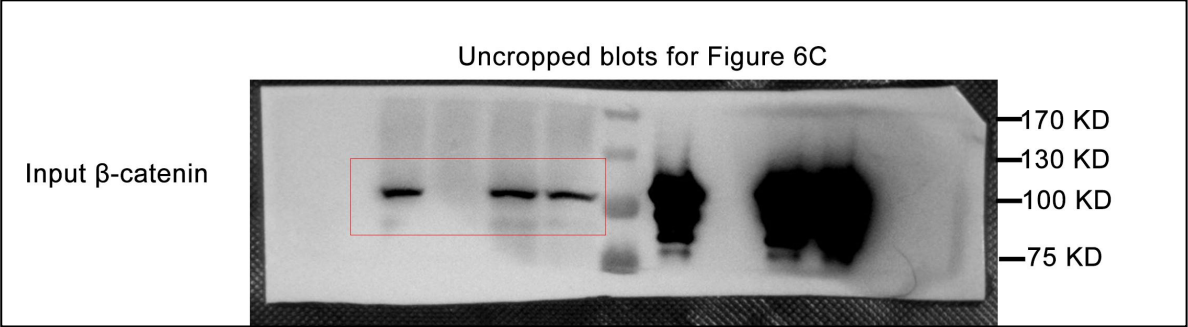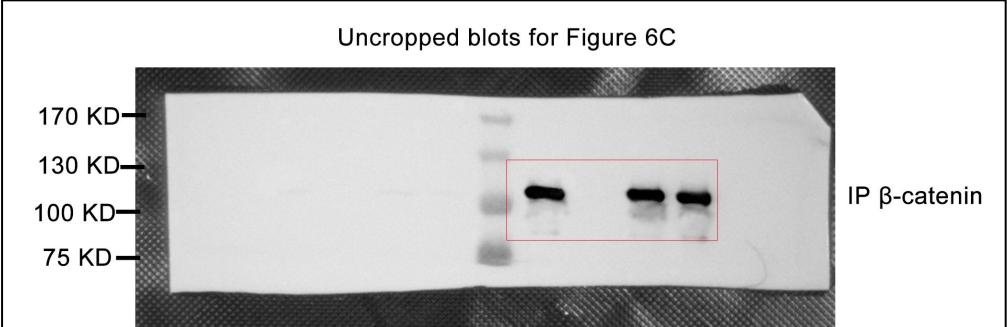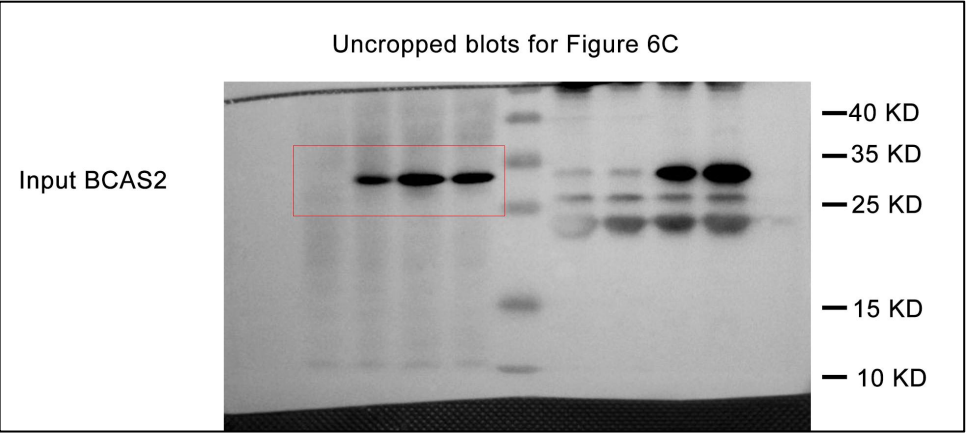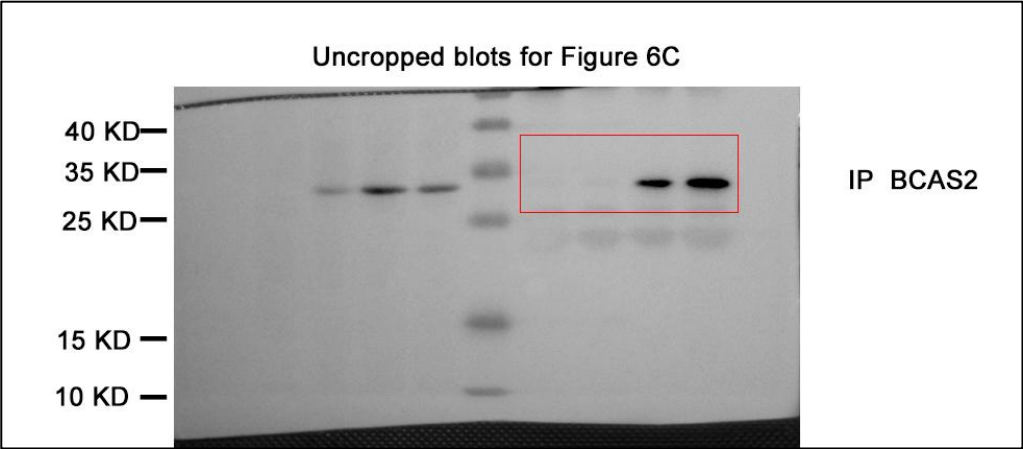

Figure 6G

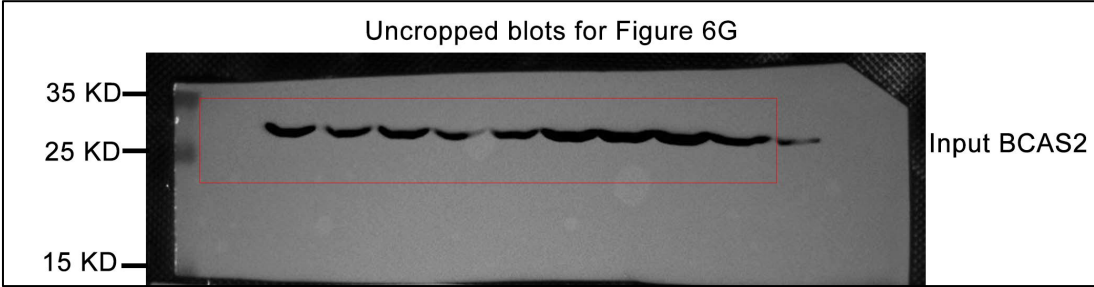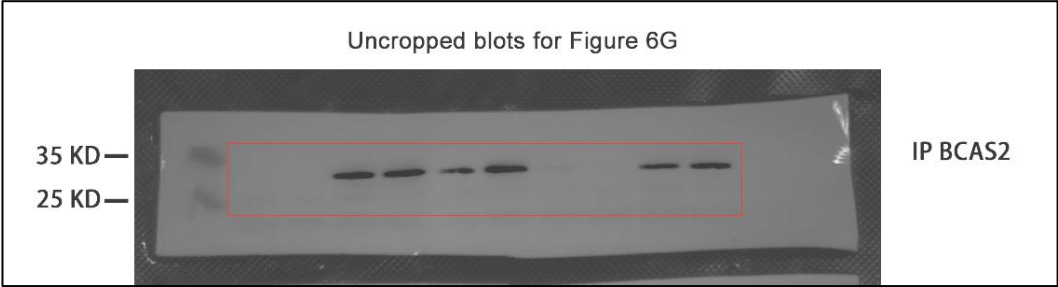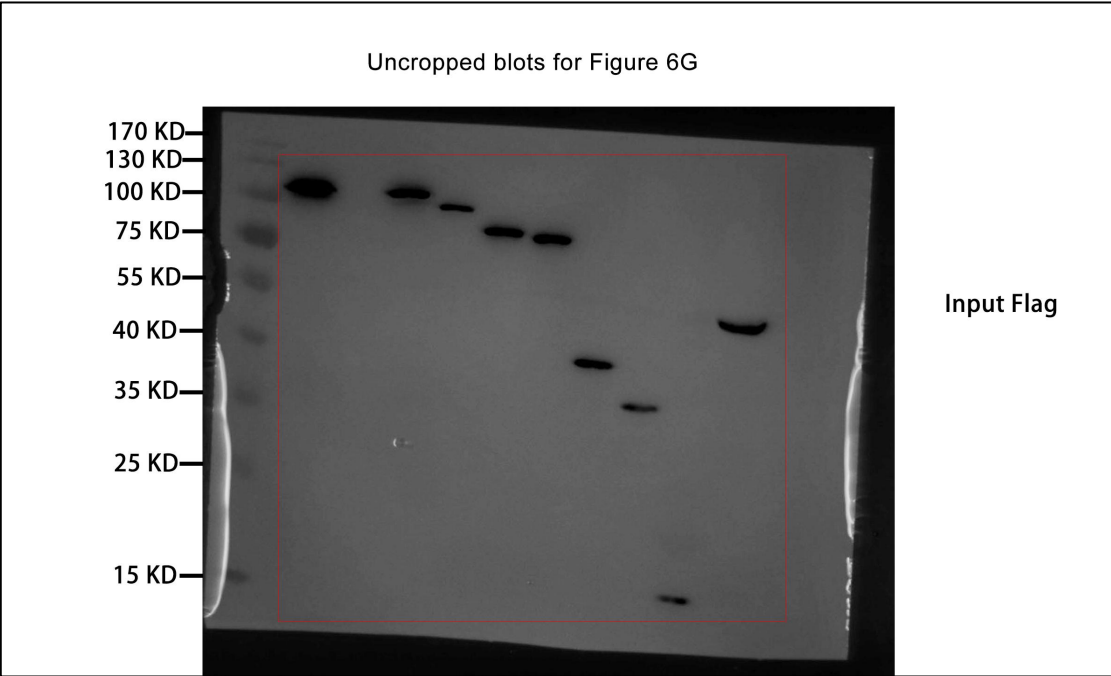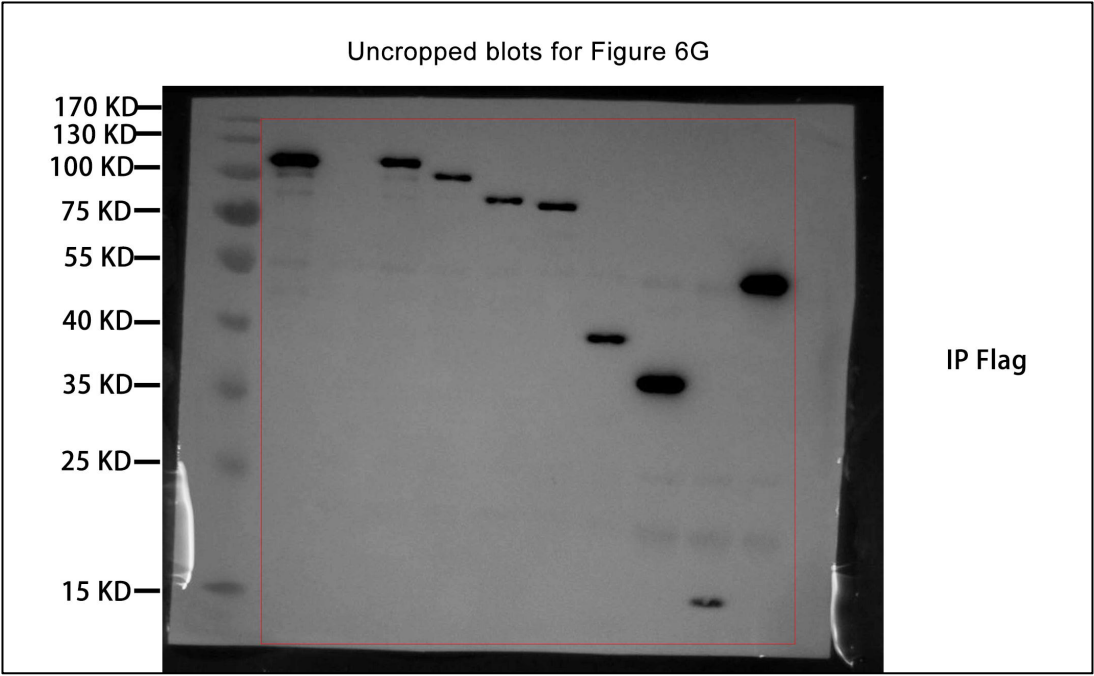

Figure 6H

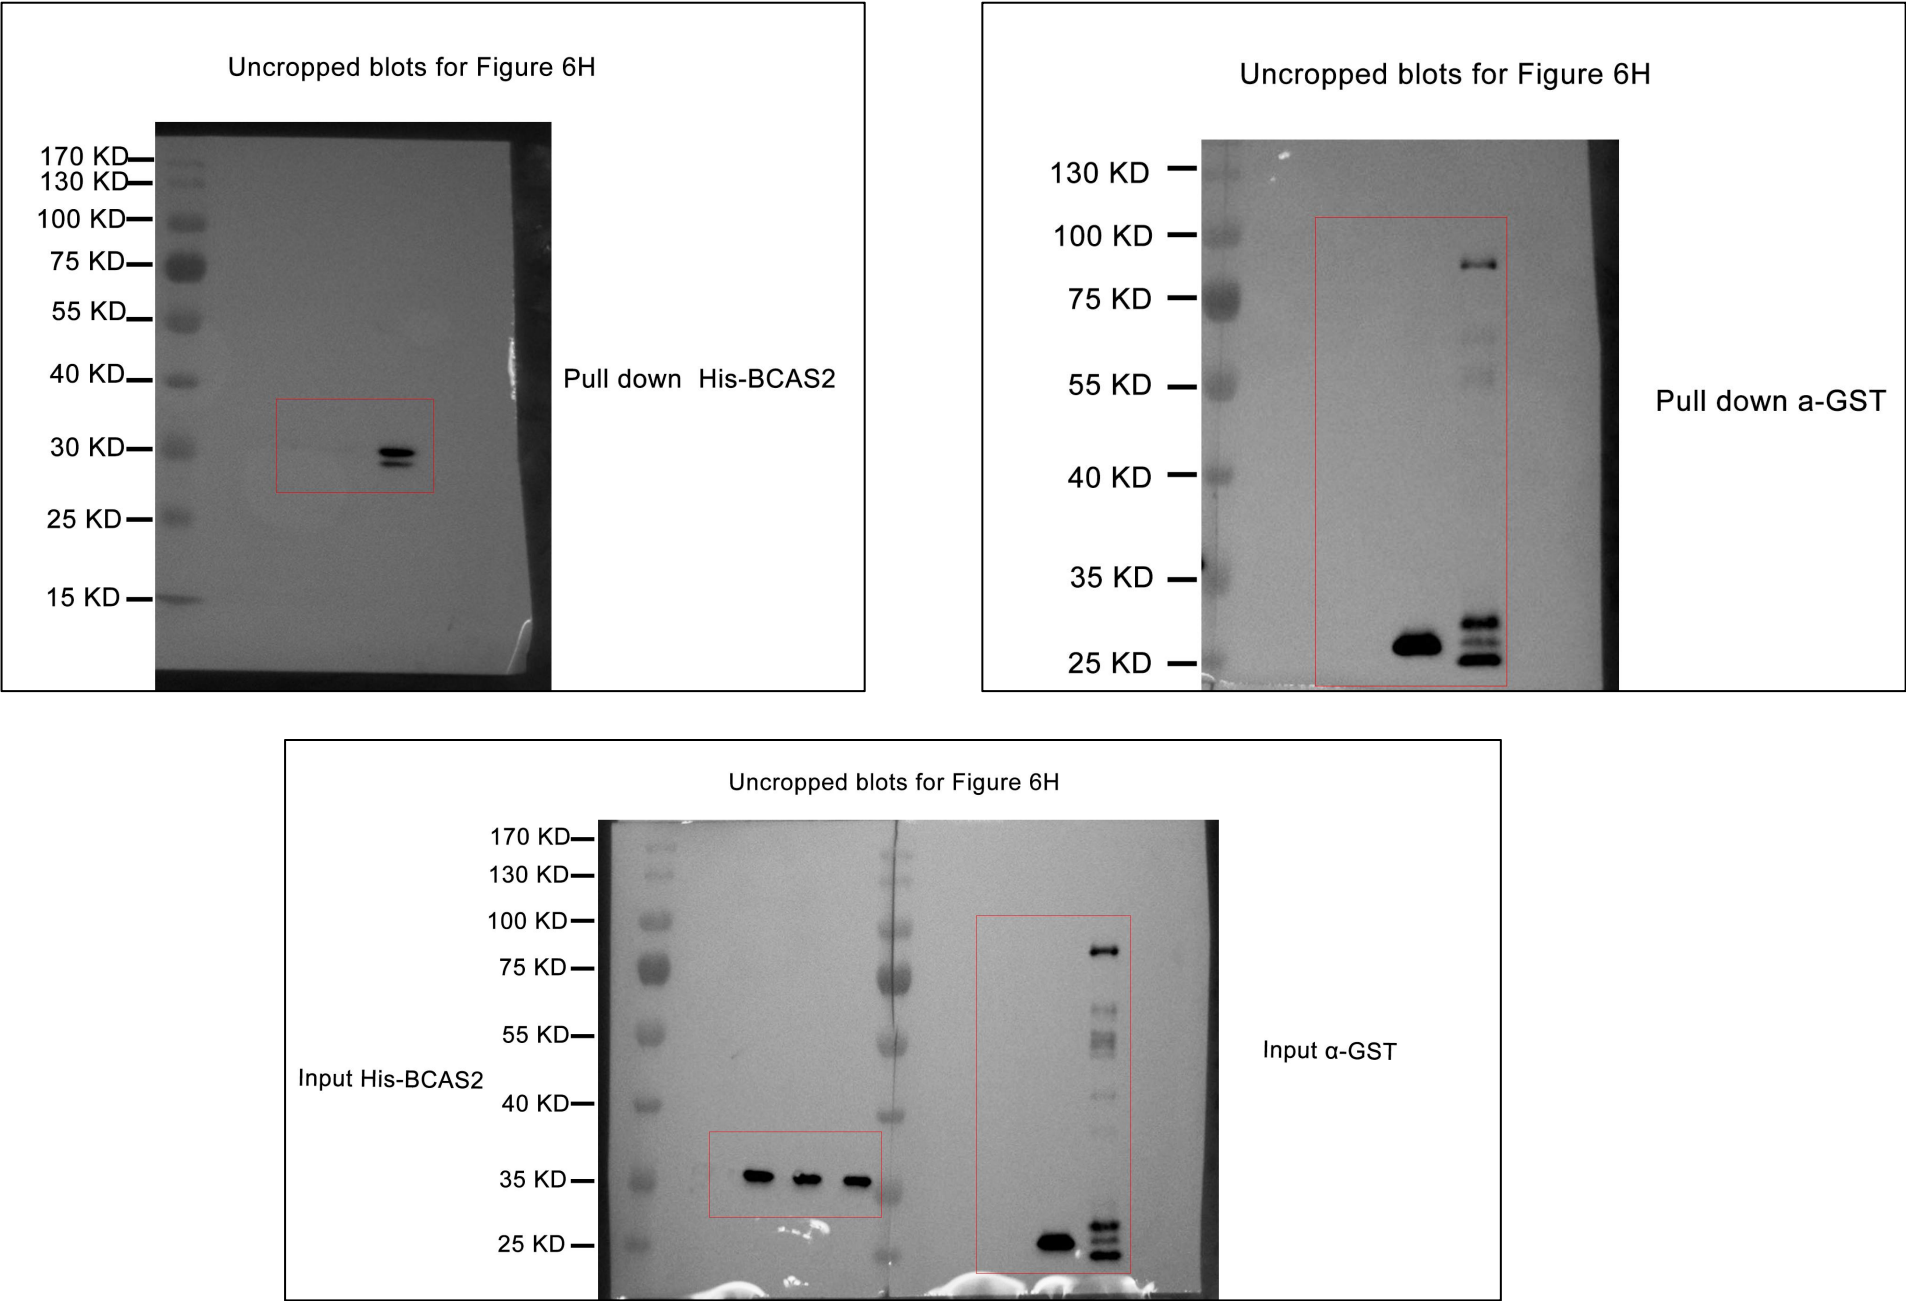

Supplement: fig6-data1 [file elife-100497-fig6-data1-v1.zip]

Figure 6-figure supplement 1

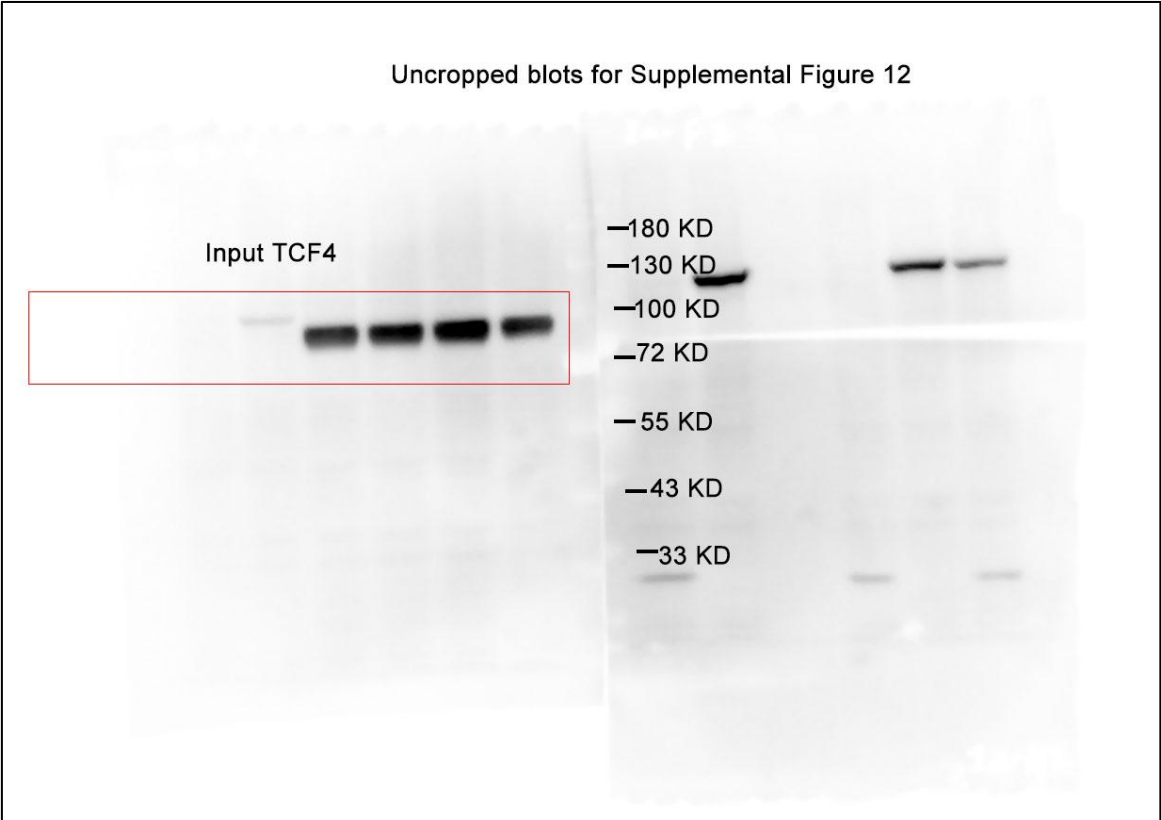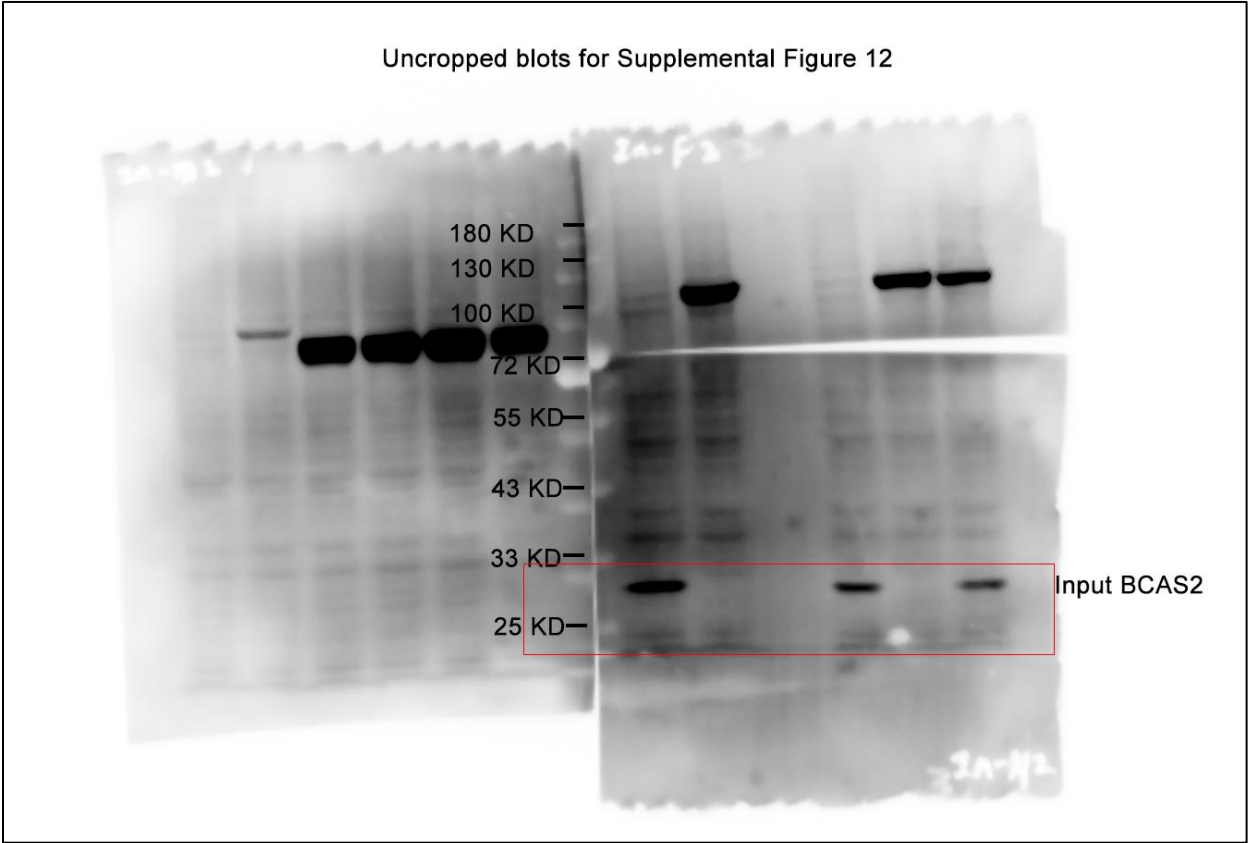

Figure 6-figure supplement 1

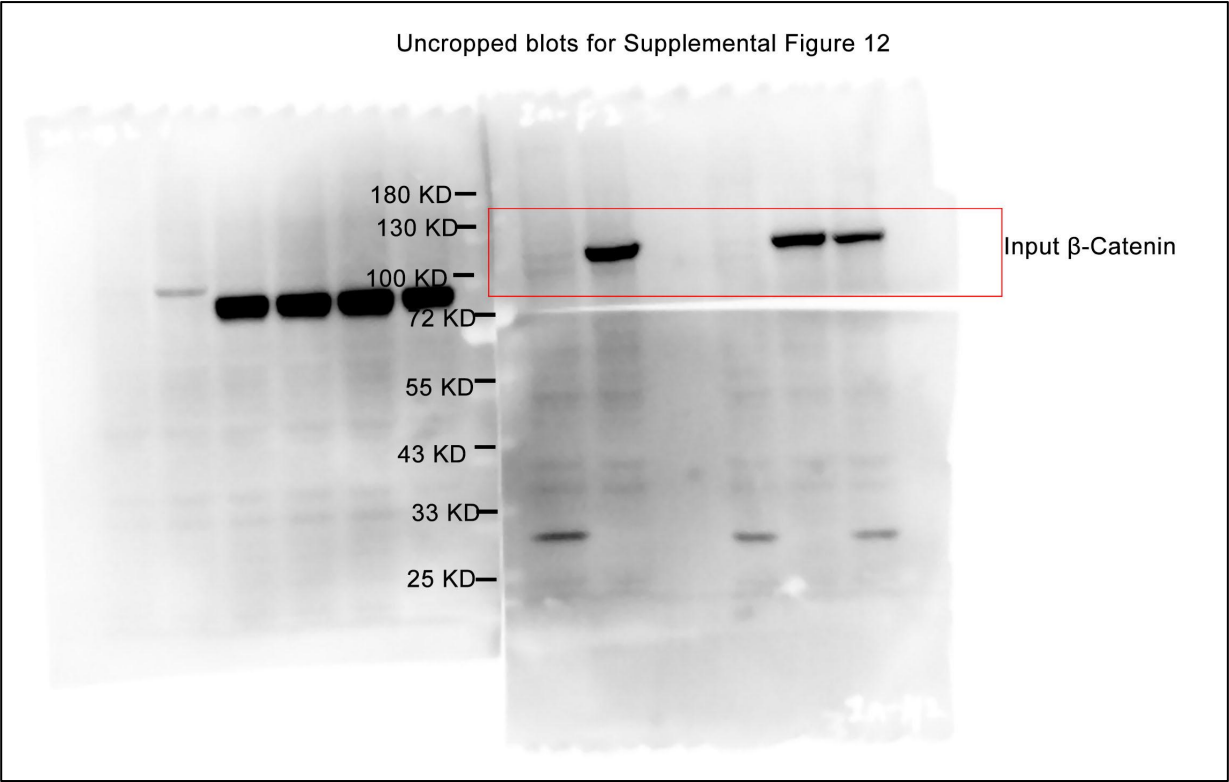

Figure 6-figure supplement 1

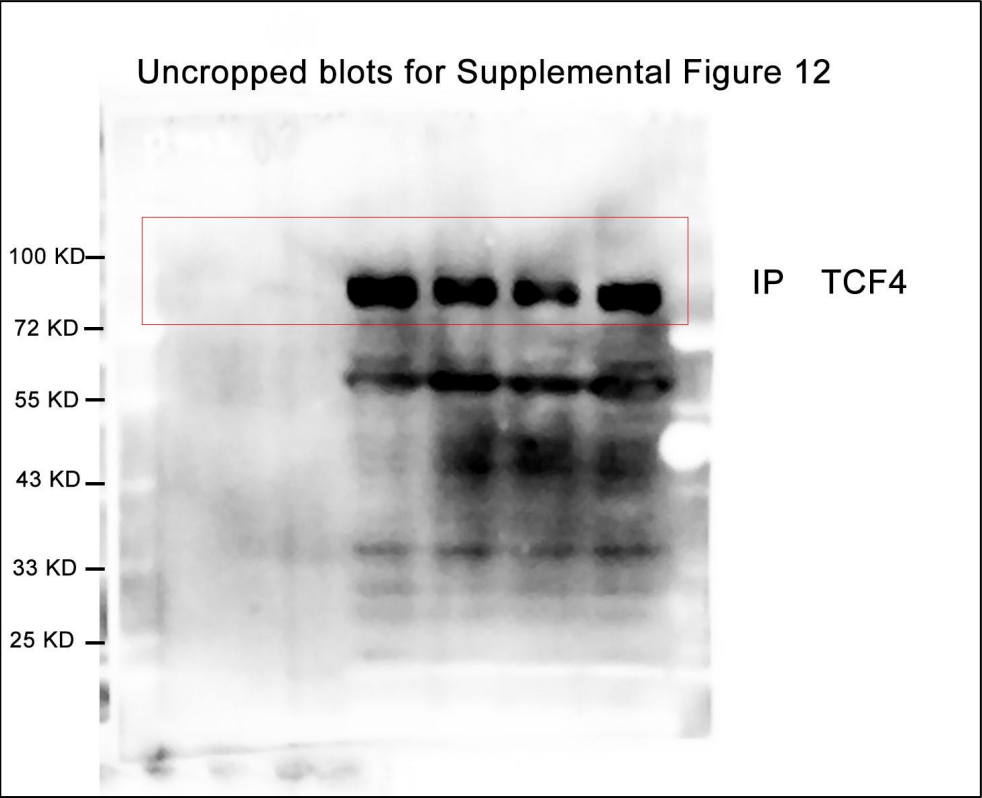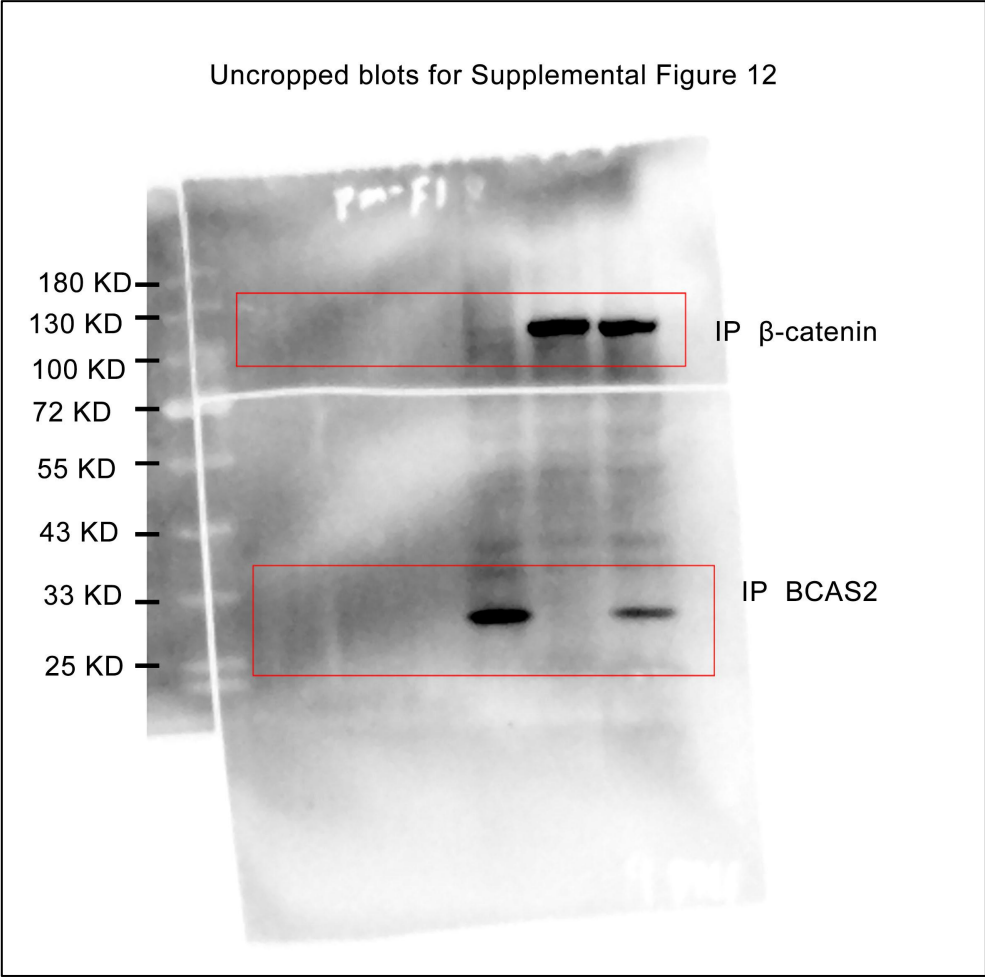

Supplement: fig6-figsupp1-data1 [file elife-100497-fig6-figsupp1-data1-v1.zip]

Figure 7B

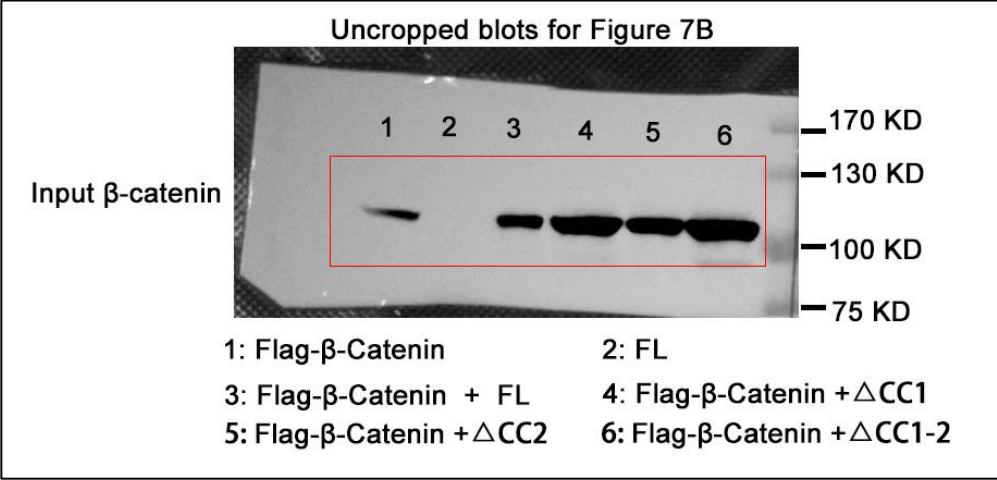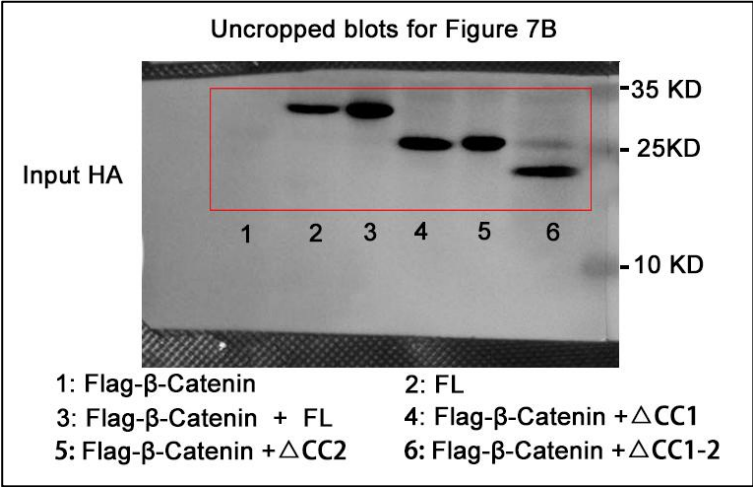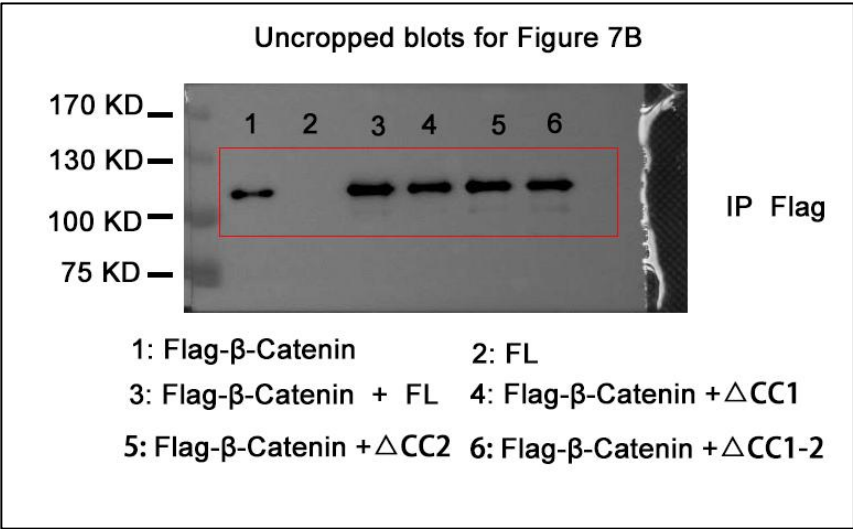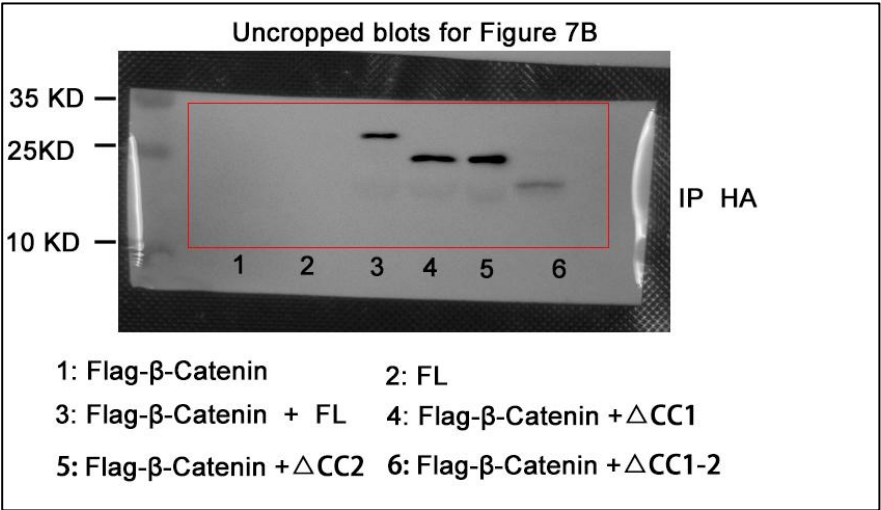

Figure 7C

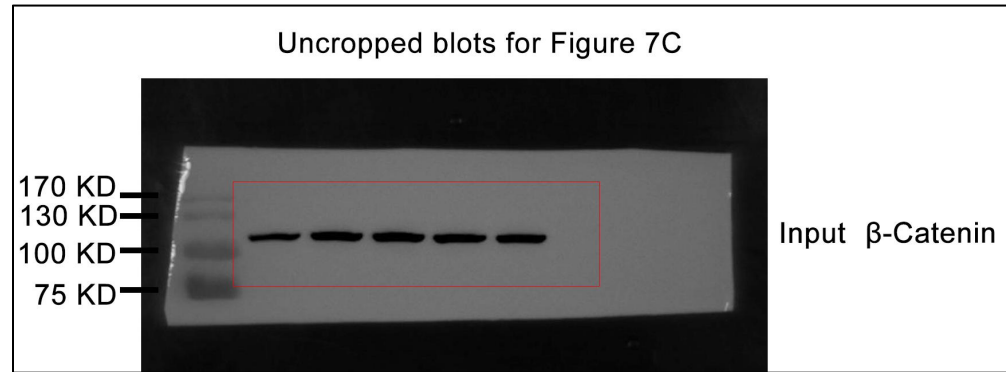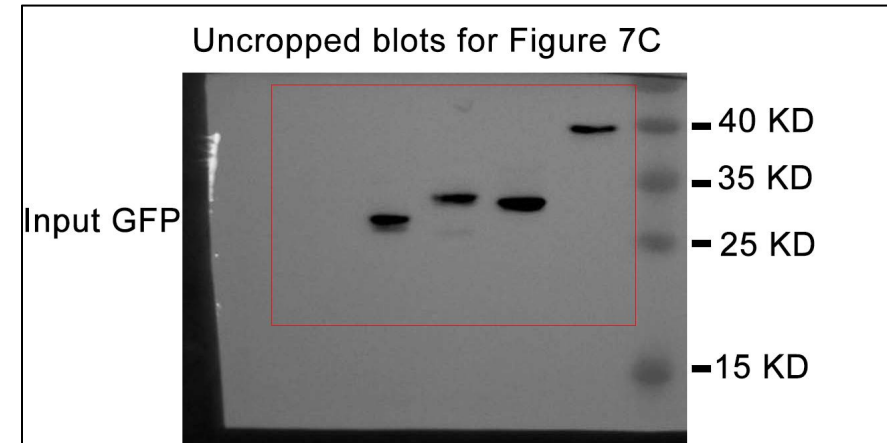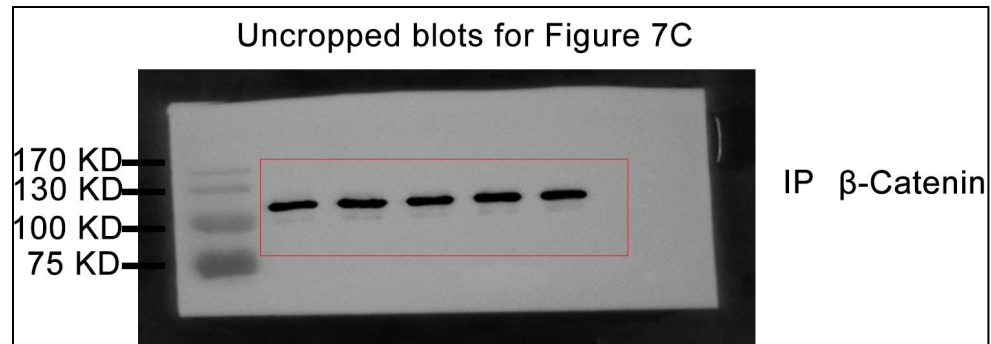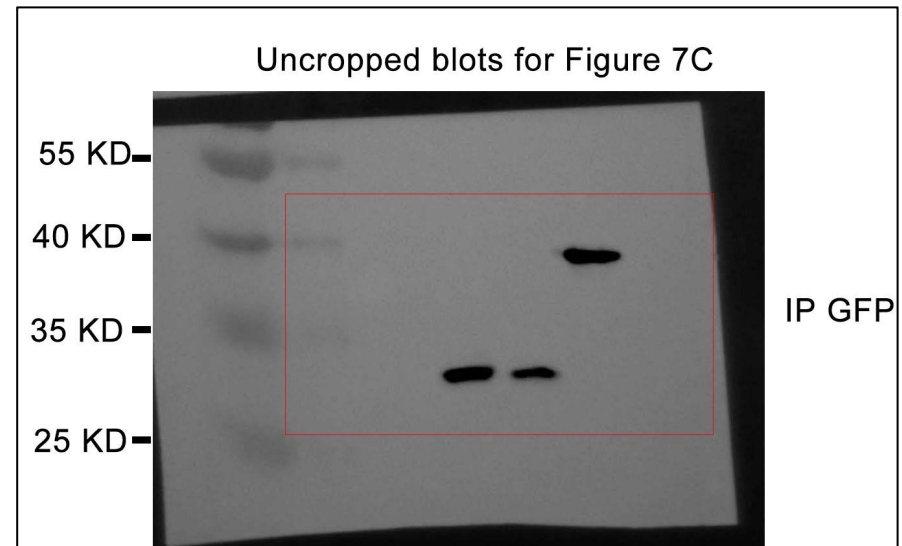

Supplement: fig7-data1 [file elife-100497-fig7-data1-v1.zip]
